# Supplementary material
Source: PubMed Central journal article supplement (PMC3955958)
Supplement: NIHMS549382-supplement-1.pdf [file NIHMS549382-supplement-1.pdf]

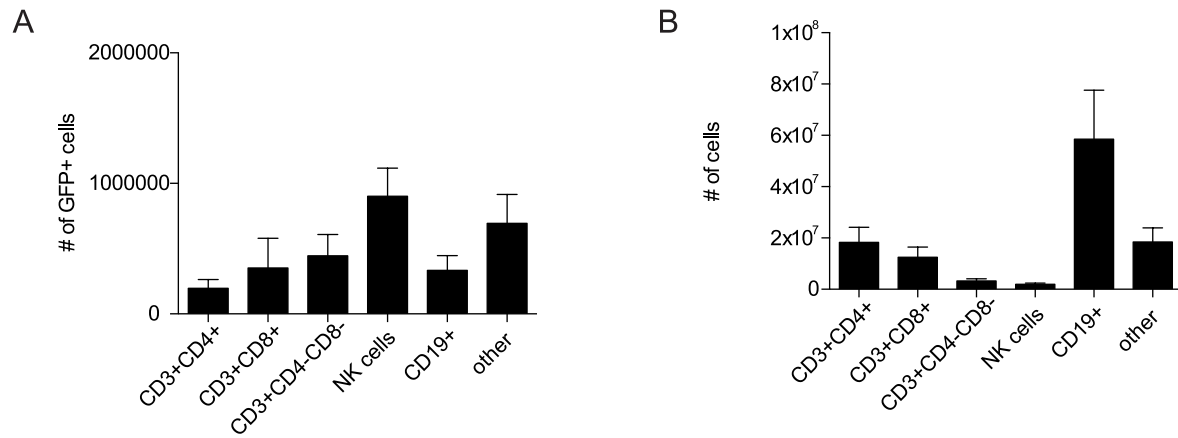

**Supplementary Figure 1: Numbers of IL-10/GFP<sup>+</sup> cells in infected Vert-X mice.**

Vert-X mice were infected for 5 days with *T. gondii*. (A) The number of different populations of IL-10/GFP<sup>+</sup> cells in the spleens of infected Vert-X mice. (B) The total number of different populations of cells in the spleens of infected Vert-X mice. NK cells were gated as DX-5<sup>+</sup> NK 1.1<sup>+</sup>CD3<sup>-</sup>CD19<sup>-</sup> cells. Error bars represent standard error.
